# Supplementary material for: Involvement of CYP4F2 in the Metabolism of a Novel Monophosphate Ester Prodrug of Gemcitabine and Its Interaction Potential In Vitro
Source: MDPI journal article supplement (doi:10.3390/molecules23051195), 2018-05-16
Supplement: s1 [file s1]

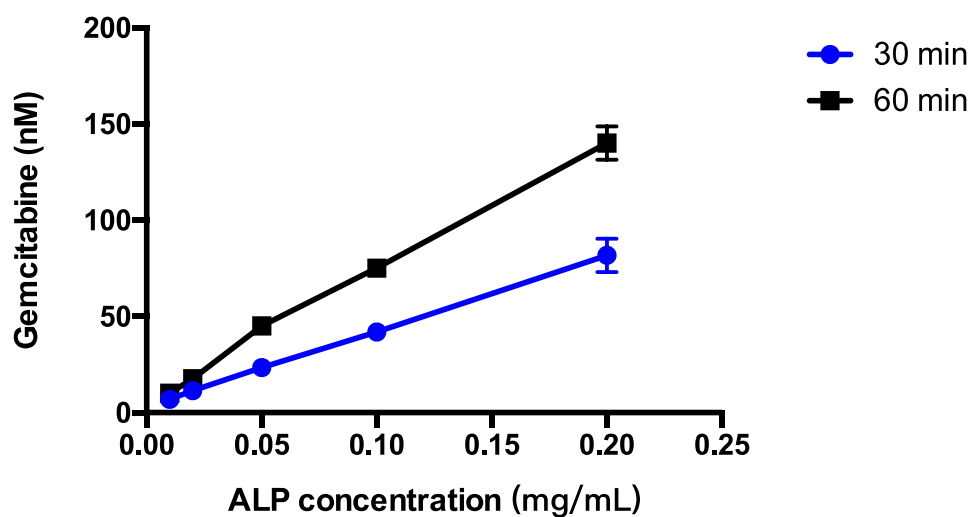

**Figure S1.** Alkaline phosphatase protein concentration-dependent formation of gemcitabine. Compound-3 (1  $\mu$ M) was incubated with alkaline phosphatase concentration ranged from 0.01~0.2 mg/mL at 37  $^{\circ}$ C (n=3).

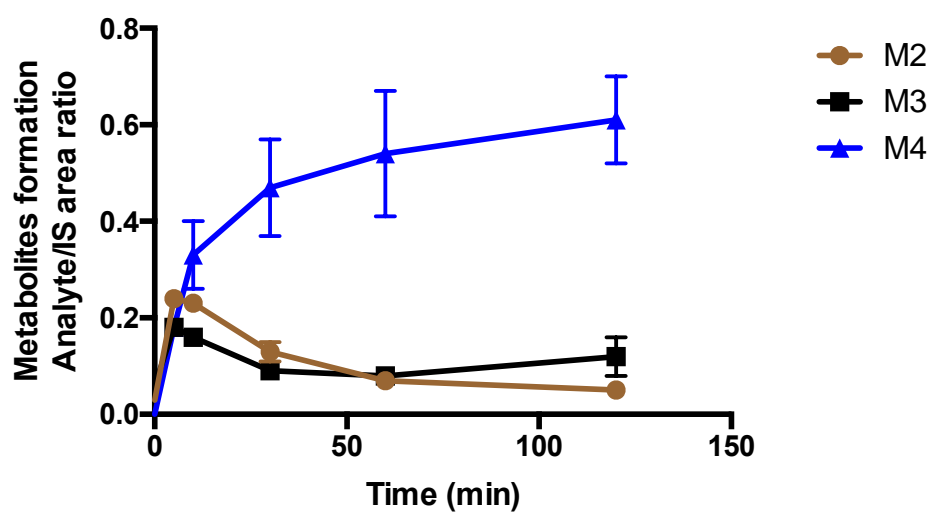

**Figure S2.** Formation of oxidative metabolites of Compound-3 in human recombinant CYP4F2. Compound-3 (1  $\mu$ M) was incubated with human recombinant CYP4F2 (50 nM) in the presence of NADPH at 37  $^{\circ}$ C.
